# Supplementary material for: Canalized Morphogenesis Driven by Inherited Tissue Asymmetries in Hydra Regeneration
Source: Genes (Basel). 2022 Feb 16;13(2):360. doi: 10.3390/genes13020360 (PMC8872179; doi:10.3390/genes13020360)
Supplement: Supplementary file 1 [file genes-13-00360-s001.zip]

Archive with 6 entries (6 files):
- genes-1523290_SuppIymentary figures.pdf
- Shani_Movie S1.avi
- Shani_Movie S2.avi
- Shani_Movie S3.avi
- Shani_Movie S4.avi
- Shani_Movie S5.avi
